# Supplementary material for: Second generation periodic table-based descriptors to encode toxicity of metal oxide nanoparticles to multiple species: QSTR modeling for exploration of toxicity mechanisms
Source: Royal Society of Chemistry journal article supplement (doi:10.1039/c8en00809d), 2018-01-01
Supplement: c8en00809d1.xlsx [file c8en00809d1.xlsx]

## Sheet: Title
Second Generation Periodic Table Based Descriptors to Encode Toxicity of Metal Oxide
Nanoparticles to Multiple Species: QSTR Modeling for Exploration of Toxicity Mechanisms
Priyanka Dea, Supratik Karb, Kunal Roya*, Jerzy Leszczynskib*
aDrug Theoretics and Cheminformatics Laboratory,
Department of Pharmaceutical Technology, Jadavpur University,
Kolkata 700032, India
bInterdisciplinary Center for Nanotoxicity,
Department of Chemistry, Physics and Atmospheric Sciences,
Jackson State University, Jackson, MS-39217, USA
*Corresponding author
Prof. Kunal Roy, Phone: +91 98315 94140; Fax: +91-33-2837-1078;
Email: kunalroy_in@yahoo.com; kroy@pharma.jdvu.ac.in
Prof. Jerzy Leszczynski, Phone: +1 601 979 3723; fax: +1 601 979 7823;
Email: jerzy@icnanotox.org

## Sheet: Datasets-Descriptors-Combined
ID	Metal oxide	Mol_wt	Nmetal	Noxygen	χ	∑χ	∑χ/nO	χox	Z_metal	Zv_metal	PN_metal	(Z-Zv)/Zv_metal	1/(PN-1)_metal	Valence	Metal alpha	tot_metal_alpha	tot_oxygen_alpha	sum aplha	metal_epsilon	oxygen_epsilon	sum_epsilon	sum_epsilon/N	squared_sum alpha	sq_sum_epsilon/N
1	AL2O3	101.96	2	3	1.61	3.22	1.07333	3	13	3	3	3.33333	0.5	3	1.66667	3.33333	0.99	4.32333	-0.766667	1.47	0.703333	0.140667	18.6912	0.0197871
2	CeO2	172.114	1	2	1.12	1.12	0.56	4	58	2	6	28	0.2	4	5.6	5.6	0.66	6.26	-5	1.47	-3.53	-1.17667	39.1876	1.38454
3	Co3O4	240.796	3	4	1.88	5.64	1.41	2.66667	27	2	4	12.5	0.333333	5	4.16667	12.5	1.32	13.82	-3.56667	1.47	-2.09667	-0.299524	190.992	0.0897145
4	CoO	74.932	1	1	1.88	1.88	1.88	2	27	2	4	12.5	0.333333	5	4.16667	4.16667	0.33	4.49667	-3.56667	1.47	-2.09667	-1.04833	20.22	1.099
5	Cr2O3	151.989	2	3	1.66	3.32	1.10667	3	24	1	4	23	0.333333	6	7.66667	15.3333	0.99	16.3233	-7.36667	1.47	-5.89667	-1.17933	266.451	1.39083
6	CuO	79.545	1	1	1.9	1.9	1.9	2	29	1	4	28	0.333333	4	9.33333	9.33333	0.33	9.66333	-9.03333	1.47	-7.56333	-3.78167	93.38	14.301
7	Fe2O3	159.687	2	3	1.83	3.66	1.22	3	26	2	4	12	0.333333	6	4	8	0.99	8.99	-3.4	1.47	-1.93	-0.386	80.8201	0.148996
8	Fe3O4	231.531	3	4	1.83	5.49	1.3725	2.66667	26	2	4	12	0.333333	6	4	12	1.32	13.32	-3.4	1.47	-1.93	-0.275714	177.422	0.0760184
9	Gd2O3	362.497	2	3	1.2	2.4	0.8	3	64	2	6	31	0.2	3	6.2	12.4	0.99	13.39	-5.6	1.47	-4.13	-0.826	179.292	0.682276
10	HfO2	210.488	1	2	1.3	1.3	0.65	4	72	2	6	35	0.2	4	7	7	0.66	7.66	-6.4	1.47	-4.93	-1.64333	58.6756	2.70054
11	In2O3	277.633	2	3	1.78	3.56	1.18667	3	49	3	5	15.3333	0.25	3	3.83333	7.66667	0.99	8.65667	-2.93333	1.47	-1.46333	-0.292667	74.9379	0.0856538
12	La2O3	325.808	2	3	1.1	2.2	0.733333	3	57	2	6	27.5	0.2	3	5.5	11	0.99	11.99	-4.9	1.47	-3.43	-0.686	143.76	0.470596
13	Mn2O3	157.873	2	3	1.55	3.1	1.03333	3	25	2	4	11.5	0.333333	7	3.83333	7.66667	0.99	8.65667	-3.23333	1.47	-1.76333	-0.352667	74.9379	0.124374
14	NiO	74.692	1	1	1.91	1.91	1.91	2	28	2	4	13	0.333333	4	4.33333	4.33333	0.33	4.66333	-3.73333	1.47	-2.26333	-1.13167	21.7467	1.28067
15	Ni2O3	165.384	2	3	1.91	3.82	1.27333	3	28	2	4	13	0.333333	4	4.33333	8.66667	0.99	9.65667	-3.73333	1.47	-2.26333	-0.452667	93.2512	0.204907
16	Sb2O3	291.517	2	3	2.05	4.1	1.36667	3	51	5	5	9.2	0.25	5	2.3	4.6	0.99	5.59	-0.8	1.47	0.67	0.134	31.2481	0.017956
17	SiO2	60.083	1	2	1.9	1.9	0.95	4	14	4	3	2.5	0.5	4	1.25	1.25	0.66	1.91	-0.05	1.47	1.42	0.473333	3.6481	0.224044
18	SnO2	150.708	1	2	1.96	1.96	0.98	4	50	4	5	11.5	0.25	4	2.875	2.875	0.66	3.535	-1.675	1.47	-0.205	-0.0683333	12.4962	0.00466944
19	TiO2	79.865	1	2	1.54	1.54	0.77	4	22	2	4	10	0.333333	4	3.33333	3.33333	0.66	3.99333	-2.73333	1.47	-1.26333	-0.421111	15.9467	0.177335
20	WO3	231.84	1	3	2.36	2.36	0.786667	6	74	2	6	36	0.2	6	7.2	7.2	0.99	8.19	-6.6	1.47	-5.13	-1.2825	67.0761	1.64481
21	Y2O3	225.809	2	3	1.22	2.44	0.813333	3	39	2	5	18.5	0.25	3	4.625	9.25	0.99	10.24	-4.025	1.47	-2.555	-0.511	104.858	0.261121
22	Yb2O3	394.08	2	3	1.1	2.2	0.733333	3	70	2	6	34	0.2	3	6.8	13.6	0.99	14.59	-6.2	1.47	-4.73	-0.946	212.868	0.894916
23	ZnO	81.379	1	1	1.65	1.65	1.65	2	30	2	4	14	0.333333	2	4.66667	4.66667	0.33	4.99667	-4.06667	1.47	-2.59667	-1.29833	24.9667	1.68567
24	ZrO2	123.222	1	2	1.33	1.33	0.665	4	40	2	5	19	0.25	4	4.75	4.75	0.66	5.41	-4.15	1.47	-2.68	-0.893333	29.2681	0.798044
25	Bi2O3	465.958	2	3	2.02	4.04	1.34667	3	83	5	6	15.6	0.2	5	3.12	6.24	0.99	7.23	-1.62	1.47	-0.15	-0.03	52.2729	0.0009
26	V2O3	149.88	2	3	1.63	3.26	1.08667	3	23	2	4	10.5	0.333333	5	3.5	7	0.99	7.99	-2.9	1.47	-1.43	-0.286	63.8401	0.081796
				*The mathematical notations and meaning of the descriptors can be found in Table 1 of main text

## Sheet: Descriptors-External set
ID	Metal oxide	Mol_wt	Nmetal	Noxygen	χ	∑χ	∑χ/nO	χox	Z_metal	Zv_metal	PN_metal	(Z-Zv)/Zv_metal	1/(PN-1)_metal	Valence	Metal alpha	tot_metal_alpha	tot_oxygen_alpha	sum aplha	metal_epsilon	oxygen_epsilon	sum_epsilon	sum_epsilon/N	squared_sum alpha	sq_sum_epsilon/N
1	Ag2O	231.74	2	1	1.93	3.86	3.86	1	47	1	5	46	0.25	4	11.5	23	0.33	23.33	-11.2	1.47	-9.73	-3.24333	544.289	10.5192
2	Au2O	409.93	2	1	2.54	5.08	5.08	1	79	1	6	78	0.2	5	15.6	31.2	0.33	31.53	-15.3	1.47	-13.83	-4.61	994.141	21.2521
3	Au2O3	441.93	2	3	2.54	5.08	1.69333	3	79	1	6	78	0.2	5	15.6	31.2	0.99	32.19	-15.3	1.47	-13.83	-2.766	1036.2	7.65076
4	BaO	153.33	1	1	0.89	0.89	0.89	2	56	2	6	27	0.2	2	5.4	5.4	0.33	5.73	-4.8	1.47	-3.33	-1.665	32.8329	2.77223
5	BeO	25.01	1	1	1.57	1.57	1.57	2	4	2	2	1	1	2	1	1	0.33	1.33	-0.4	1.47	1.07	0.535	1.7689	0.286225
6	Bi2O3	465.958	2	3	2.02	4.04	1.34667	3	83	5	6	15.6	0.2	5	3.12	6.24	0.99	7.23	-1.62	1.47	-0.15	-0.03	52.2729	0.0009
7	CaO	56.08	1	1	1	1	1	2	20	2	4	9	0.333333	2	3	3	0.33	3.33	-2.4	1.47	-0.93	-0.465	11.0889	0.216225
8	CdO	128.41	1	1	1.69	1.69	1.69	2	48	2	5	23	0.25	2	5.75	5.75	0.33	6.08	-5.15	1.47	-3.68	-1.84	36.9664	3.3856
9	CeO2	172.11	1	2	1.12	1.12	0.56	4	58	2	6	28	0.2	4	5.6	5.6	0.66	6.26	-5	1.47	-3.53	-1.17667	39.1876	1.38454
10	Co2O3	165.86	2	3	1.88	3.76	1.25333	3	27	2	4	12.5	0.333333	6	4.16667	8.33333	0.99	9.32333	-3.56667	1.47	-2.09667	-0.419333	86.9245	0.17584
11	Co3O4	240.796	3	4	1.88	5.64	1.41	2.66667	27	2	4	12.5	0.333333	5	4.16667	12.5	1.32	13.82	-3.56667	1.47	-2.09667	-0.299524	190.992	0.0897145
12	CuO	79.545	1	1	1.9	1.9	1.9	2	29	1	4	28	0.333333	4	9.33333	9.33333	0.33	9.66333	-9.03333	1.47	-7.56333	-3.78167	93.38	14.301
13	Fe3O4	231.53	3	4	1.83	5.49	1.3725	2.66667	26	2	4	12	0.333333	6	4	12	1.32	13.32	-3.4	1.47	-1.93	-0.275714	177.422	0.0760184
14	Ga2O3	187.44	2	3	1.81	3.62	1.20667	3	31	3	4	9.33333	0.333333	3	3.11111	6.22222	0.99	7.21222	-2.21111	1.47	-0.741111	-0.148222	52.0161	0.0219698
15	Gd2O3	362.5	2	3	1.2	2.4	0.8	3	64	2	6	31	0.2	3	6.2	12.4	0.99	13.39	-5.6	1.47	-4.13	-0.826	179.292	0.682276
16	GeO2	104.64	1	2	2.01	2.01	1.005	4	32	4	4	7	0.333333	4	2.33333	2.33333	0.66	2.99333	-1.13333	1.47	0.336667	0.112222	8.96004	0.0125938
17	HfO2	210.49	1	2	1.3	1.3	0.65	4	72	2	6	35	0.2	4	7	7	0.66	7.66	-6.4	1.47	-4.93	-1.64333	58.6756	2.70054
18	HgO	216.59	1	1	2	2	2	2	80	2	6	39	0.2	4	7.8	7.8	0.33	8.13	-7.2	1.47	-5.73	-2.865	66.0969	8.20823
19	IrO2	224.22	1	2	2.2	2.2	1.1	4	77	2	6	37.5	0.2	8	7.5	8.2	1.99	9.19	-6.9	1.47	-5.43	-1.81	84.4561	3.2761
20	MgO	40.3	1	1	1.31	1.31	1.31	2	12	2	3	5	0.5	2	2.5	2.5	0.33	2.83	-1.9	1.47	-0.43	-0.215	8.0089	0.046225
21	MnO2	86.94	1	2	1.55	1.55	0.775	4	25	2	4	11.5	0.333333	7	3.83333	3.83333	0.66	4.49333	-3.23333	1.47	-1.76333	-0.587778	20.19	0.345483
22	Mo2O3	239.88	2	3	2.16	4.32	1.44	3	42	1	5	41	0.25	6	10.25	20.5	0.99	21.49	-9.95	1.47	-8.48	-1.696	461.82	2.87642
23	Nb2O3	233.81	2	3	1.6	3.2	1.06667	3	41	1	5	40	0.25	5	10	20	0.99	20.99	-9.7	1.47	-8.23	-1.646	440.58	2.70932
24	Ni2O3	165.39	2	3	1.91	3.82	1.27333	3	28	2	4	13	0.333333	4	4.33333	8.66667	0.99	9.65667	-3.73333	1.47	-2.26333	-0.452667	93.2512	0.204907
25	OsO2	222.23	1	2	2.2	2.2	1.1	4	76	2	6	37	0.2	8	7.4	7.4	0.66	8.06	-6.8	1.47	-5.33	-1.77667	64.9636	3.15654
26	PbO	223.2	1	1	2.33	2.33	2.33	2	82	4	6	19.5	0.2	4	3.9	3.9	0.33	4.23	-2.7	1.47	-1.23	-0.615	17.8929	0.378225
27	PbO2	239.2	1	2	2.33	2.33	1.165	4	82	4	6	19.5	0.2	4	3.9	3.9	0.66	4.56	-2.7	1.47	-1.23	-0.41	20.7936	0.1681
28	PdO	122.42	1	1	2.2	2.2	2.2	2	46	18	5	1.55556	0.25	4	0.388889	0.388889	0.33	0.718889	5.01111	1.47	6.48111	3.24056	0.516801	10.5012
29	PtO	211.08	1	1	2.28	2.28	2.28	2	78	1	6	77	0.2	6	15.4	15.4	0.33	15.73	-15.1	1.47	-13.63	-6.815	247.433	46.4442
30	PtO2	227.08	1	2	2.28	2.28	1.14	4	78	1	6	77	0.2	6	15.4	15.4	0.66	16.06	-15.1	1.47	-13.63	-4.54333	257.924	20.6419
31	ReO2	218.21	1	2	1.9	1.9	0.95	4	75	2	6	36.5	0.2	7	7.3	7.3	0.66	7.96	-6.7	1.47	-5.23	-1.74333	63.3616	3.03921
32	Rh2O3	253.81	2	3	2.28	4.56	1.52	3	45	1	5	44	0.25	6	11	22	0.99	22.99	-10.7	1.47	-9.23	-1.846	528.54	3.40772
33	RuO2	133.07	1	2	2.2	2.2	1.1	4	44	1	5	43	0.25	8	10.75	10.75	0.66	11.41	-10.45	1.47	-8.98	-2.99333	130.188	8.96004
34	Sc2O3	137.91	2	3	1.36	2.72	0.906667	3	21	2	4	9.5	0.333333	3	3.16667	6.33333	0.99	7.32333	-2.56667	1.47	-1.09667	-0.219333	53.6312	0.0481071
35	SrO	103.62	1	1	0.95	0.95	0.95	2	38	2	5	18	0.25	2	4.5	4.5	0.33	4.83	-3.9	1.47	-2.43	-1.215	23.3289	1.47623
36	Ta2O3	409.89	2	3	1.5	3	1	3	73	2	6	35.5	0.2	5	7.1	14.2	0.99	15.19	-6.5	1.47	-5.03	-1.006	230.736	1.01204
37	TcO2	130	1	2	1.9	1.9	0.95	4	43	2	5	20.5	0.25	7	5.125	5.125	0.66	5.785	-4.525	1.47	-3.055	-1.01833	33.4662	1.037
38	Tl2O	424.77	2	1	1.62	3.24	3.24	1	81	3	6	26	0.2	3	5.2	10.4	0.33	10.73	-4.3	1.47	-2.83	-0.943333	115.133	0.889878
39	Tl2O3	456.76	2	3	1.62	3.24	1.08	3	81	3	6	26	0.2	3	5.2	10.4	0.99	11.39	-4.3	1.47	-2.83	-0.566	129.732	0.320356
40	WO2	215.84	1	2	2.36	2.36	1.18	4	74	2	6	36	0.2	6	7.2	7.2	0.66	7.86	-6.6	1.47	-5.13	-1.71	61.7796	2.9241
41	WO3	231.84	1	3	2.36	2.36	0.786667	6	74	2	6	36	0.2	6	7.2	7.2	0.99	8.19	-6.6	1.47	-5.13	-1.2825	67.0761	1.64481
42	Yb2O3	394.08	2	3	1.1	2.2	0.733333	3	70	2	6	34	0.2	3	6.8	13.6	0.99	14.59	-6.2	1.47	-4.73	-0.946	212.868	0.894916
		*The mathematical notations and meaning of the descriptors can be found in Table 1 of main text

## Sheet: Ecoli-HaCaT Interspecies
ID	Metal oxide	χox	pEC50_HaCaT	Observed_pEC50Ecoli	Predicted_pEC50Ecoli
1	AL2O3	3	1.85	2.49	2.4825
2	Bi2O3	3	2.5	2.82	2.814
3	CoO	2	2.83	3.51	3.4313
4	Cr2O3	3	2.3	2.51	2.712
5	Fe2O3	3	2.05	2.29	2.5845
6	In2O3	3	2.92	2.81	3.0282
7	La2O3	3	2.87	2.87	3.0027
8	Mn2O3	3	2.64	3.08	2.8854
9	NiO	2	2.49	3.45	3.2579
10	Sb2O3	3	2.31	2.64	2.7171
11	SiO2	4	2.12	2.2	2.1712
12	SnO2	4	2.67	2.01	2.4517
13	TiO2	4	1.76	1.74	1.9876
14	V2O3	3	2.24	3.14	2.6814
15	Y2O3	3	2.21	2.87	2.6661
16	ZnO	2	3.32	3.45	3.6812
17	ZrO2	4	2.02	2.15	2.1202
			Metal oxides marked in red are included in test set
			*The mathematical notations and meaning of the descriptors can be found in Table 1 of main text

## Sheet: Ecoli-Zebrafish Interspecies
ID	Metal oxide	χox	%EI_zebrafish	Observed_pEC50Ecoli	Predicted_pEC50Ecoli
1	AL2O3	3	3.44	2.49	2.74236
2	Co3O4	2.66667	-1.04	3	2.98497
3	CoO	2	4	3.51	3.45094
4	Cr2O3	3	44.72	2.51	2.68561
5	CuO	2	50	3.2	3.3877
6	Fe2O3	3	11.04	2.29	2.73191
7	In2O3	3	7.12	2.81	2.7373
8	La2O3	3	13.28	2.87	2.72883
9	Mn2O3	3	17.2	3.08	2.72345
10	NiO	2	34.56	3.45	3.40892
11	Sb2O3	3	9.04	2.64	2.73466
12	SiO2	4	10.48	2.2	2.02334
13	SnO2	4	2.56	2.01	2.03423
14	TiO2	4	9.92	1.74	2.02411
15	Y2O3	3	9.36	2.87	2.73422
16	ZnO	2	42.72	3.45	3.39771
17	ZrO2	4	7.36	2.15	2.02763
			Metal oxides marked in red are included in test set
			*The mathematical notations and meaning of the descriptors can be found in Table 1 of main text

## Sheet: HaCaT-Zebrafish Interspecies
ID	Metal oxide	sq_sum_epsilon/N	pEC50_HaCaT	Observed_%EI_zebrafish	Predicted_%EI_zebrafish
1	AL2O3	0.0197871	1.85	3.44	5.91314
3	Cr2O3	1.39083	2.3	44.72	35.4637
4	Fe2O3	0.148996	2.05	11.04	8.80154
5	In2O3	0.0856538	2.92	7.12	8.02139
6	La2O3	0.470596	2.87	13.28	16.2024
7	Mn2O3	0.124374	2.64	17.2	8.66368
8	NiO	1.28067	2.49	34.56	33.238
9	Sb2O3	0.017956	2.31	9.04	6.17621
10	SiO2	0.224044	2.12	10.48	10.4489
11	SnO2	0.00466944	2.67	2.56	6.12916
12	TiO2	0.177335	1.76	9.92	9.21574
14	Y2O3	0.261121	2.21	9.36	11.2991
15	ZnO	1.68567	3.32	42.72	42.425
16	ZrO2	0.798044	2.02	7.36	22.6311
			Metal oxides marked in red are included in test set
			*The mathematical notations and meaning of the descriptors can be found in Table 1 of main text

## Sheet: Figure S1
		Figure S1 PCA score plot for single QSTR models

## Sheet: Figure S2
		Figure S2 PCA score plot for Interspecies models

## Sheet: Figure S3
	Figure S2 Williams Plot for Single models

## Sheet: Figure S4
	Figure S4 Williams Plot for Interspecies models

[truncated: 3 more sheets: Table S1, Table S2, Table S3]
